# Supplementary material
Source: Springer Nature journal article supplement (https://www.springermedizin.de/resource/supplementary/13256_2011_2119_MOESM4_ESM.pdf/9648988)

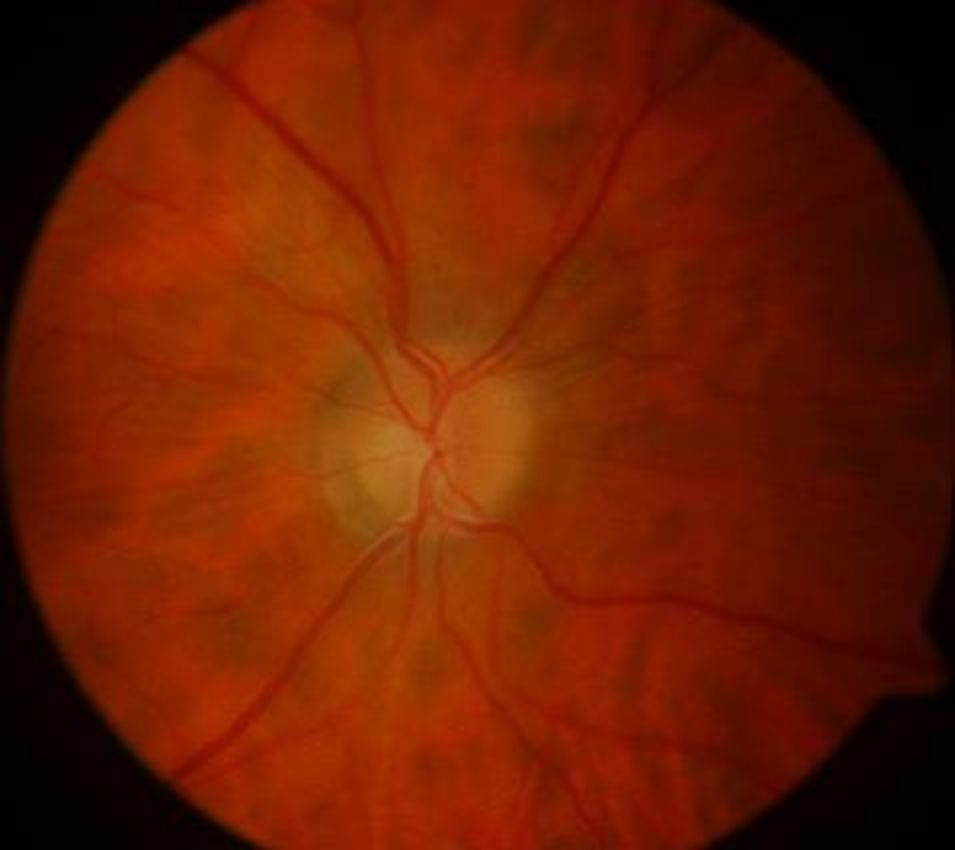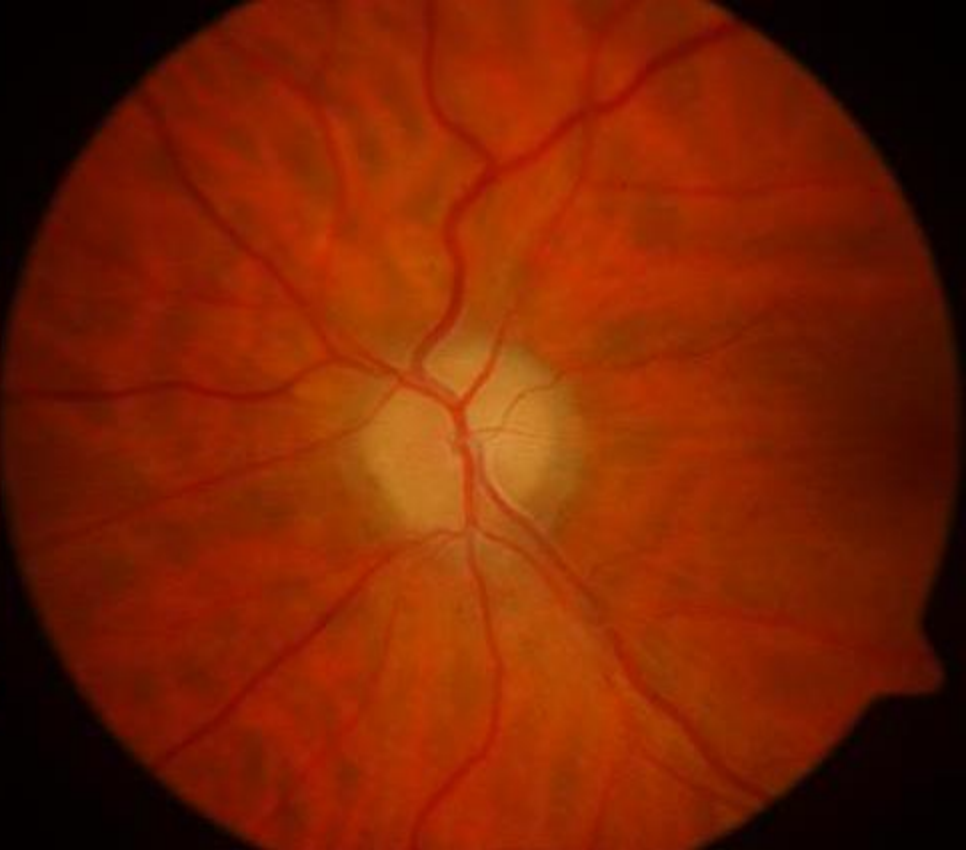

Supplement: MOESM4 [file 9648988]
